# Supplementary material for: Preference and Prey Switching in a Generalist Predator Attacking Local and Invasive Alien Pests
Source: PubMed Central journal article supplement (PMC3846826; doi:10.1371/journal.pone.0082231), 2013-12-02
Supplement: pone.0082231.s001.pdf [file pone.0082231.s001.pdf]

**Table S1** (Jaworski CC, Bompard A, Genies L, Amiens-Desneux E, Desneux N, 2013, Preference and prey switching in a generalist predator attacking local and invasive alien pests. PLoS ONE. doi:10.1371/journal.pone.0082231.)

| <i>Tuta absoluta</i> stage | Egg | L1   | L2   | L3   | L4   | Pupae |
|----------------------------|-----|------|------|------|------|-------|
| Mortality (%)              | 1.7 | 15.2 | 4.0  | 6.2  | 6.6  | 2.5   |
| Cumulated mortality (%)    | 1.7 | 17.0 | 21.0 | 27.2 | 33.8 | 36.3  |
