# Supplementary material for: Preference and Prey Switching in a Generalist Predator Attacking Local and Invasive Alien Pests
Source: PubMed Central journal article supplement (PMC3846826; doi:10.1371/journal.pone.0082231), 2013-12-02

**Figure S1** (Jaworski CC, Bompard A, Genies L, Amiens-Desneux E, Desneux N, 2013, Preference and prey switching in a generalist predator attacking local and invasive alien pests. PLoS ONE. doi:10.1371/journal.pone.0082231.)

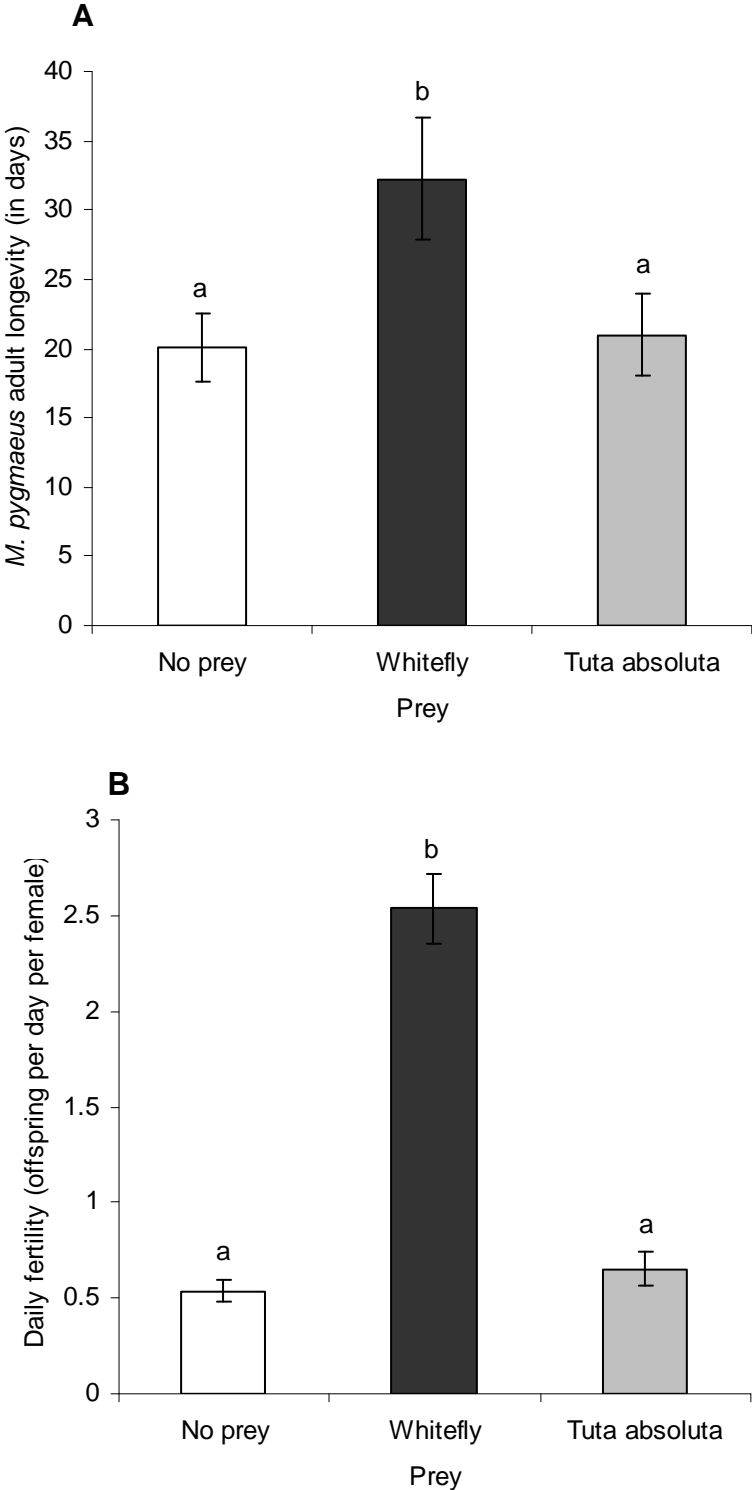

Supplement: pone.0082231.s002.pdf [file pone.0082231.s002.pdf]
